# Supplementary material
Source: PubMed Central journal article supplement (PMC6377857)
Supplement: NIHMS992797-supplement-S2.pdf [file NIHMS992797-supplement-S2.pdf]

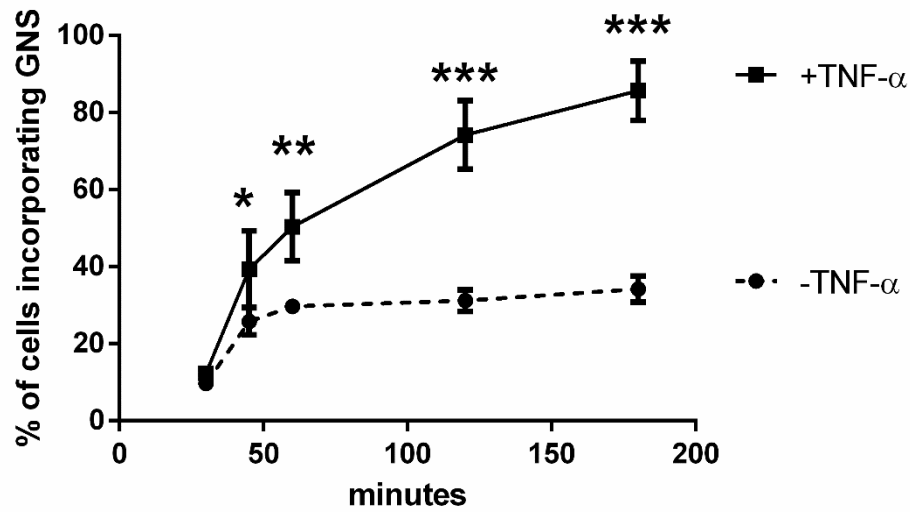

**Figure S2. Graphene nanostars (GNS) uptake kinetics in macrophages in cell culture.** Time-course of RAW 264.7 macrophages incorporating GNS (10  $\mu\text{g}/\text{mL}$ ) in the presence or absence of TNF- $\alpha$  (5  $\text{ng}/\text{mL}$ ) quantified in bright field microscope images obtained after 30, 45, 60, 120 and 180 min of incubation. \*\*\* indicates  $P \leq 0.0001$ , \*\* indicates  $P \leq 0.01$ , \* indicates  $P \leq 0.05$  using a Student's t-test. Values are mean  $\pm$  S.E.M.
