# Supplementary material
Source: PubMed Central journal article supplement (PMC6377857)
Supplement: NIHMS992797-supplement-S3.pdf [file NIHMS992797-supplement-S3.pdf]

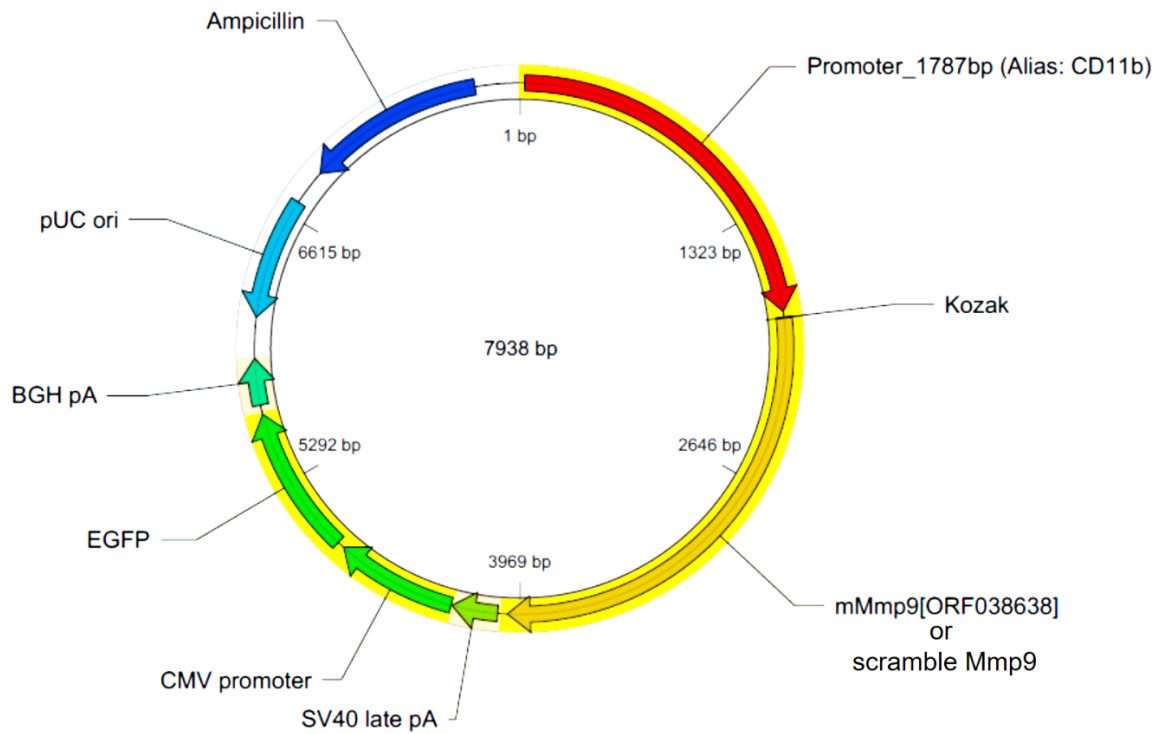

**Figure S3. Scramble and MMP-9 plasmid maps.** A specific promoter for infiltrated inflammatory macrophages (CD11b) controls the expression of scramble or MMP-9 genes. A strong constitutive promoter promotes the expression of the gene reporter enhanced green fluorescent protein (eGFP) to stain cells incorporating the plasmid and allowing correct transcription. A selection gene for Ampicillin is also present to obtain only the bacterial colonies synthesizing the plasmid.
