# Supplementary material
Source: PubMed Central journal article supplement (PMC6377857)
Supplement: NIHMS992797-supplement-S4.pdf [file NIHMS992797-supplement-S4.pdf]

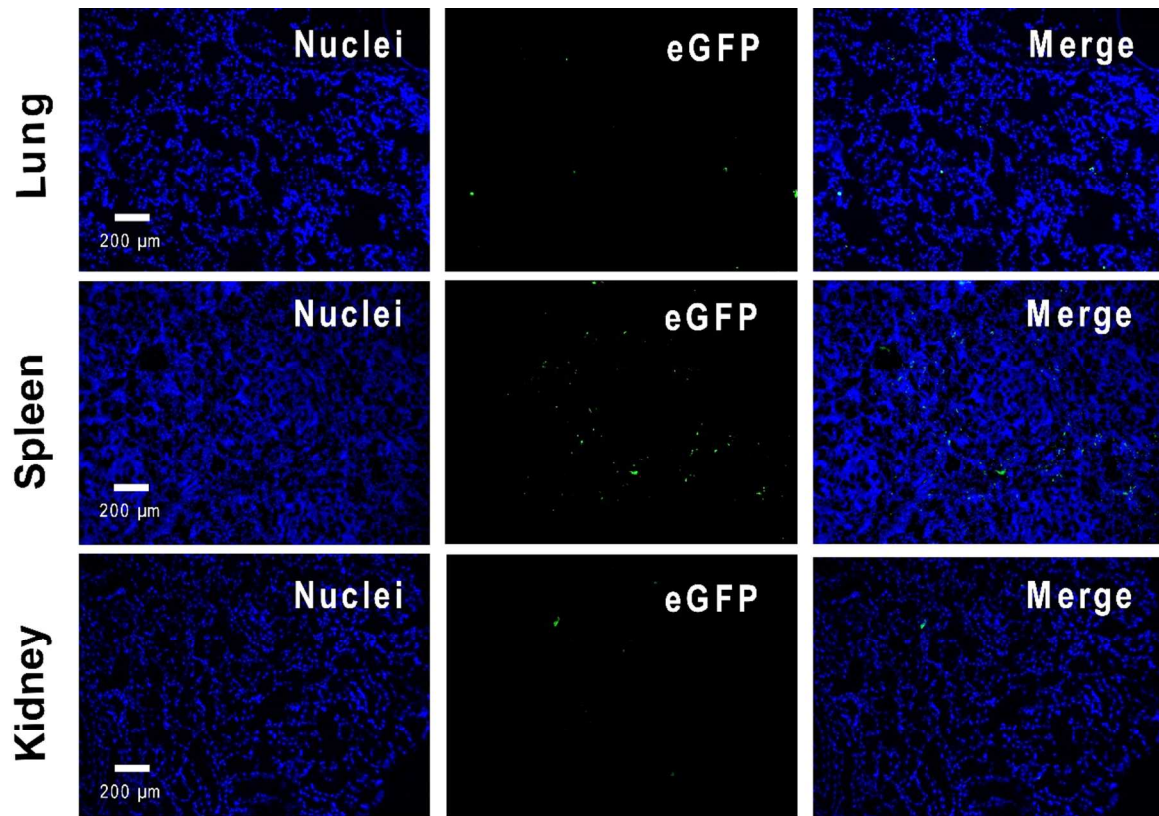

**Figure S4. *In vivo* distribution of pSCR-DGNS in lung, spleen and kidney from cirrhotic mice.** Representative images of detection of functional plasmids (eGFP in green) in lung, spleen and kidney tissue slices from cirrhotic animals treated with scramble plasmid linked to dendrimer graphene nanostars (pSCR-DGNS). Cell nuclei were stained with DAPI (in blue). Merge shows cells co-localizing for eGFP with cells.
