# Supplementary material
Source: PubMed Central journal article supplement (PMC6377857)
Supplement: NIHMS992797-supplement-S5.pdf [file NIHMS992797-supplement-S5.pdf]

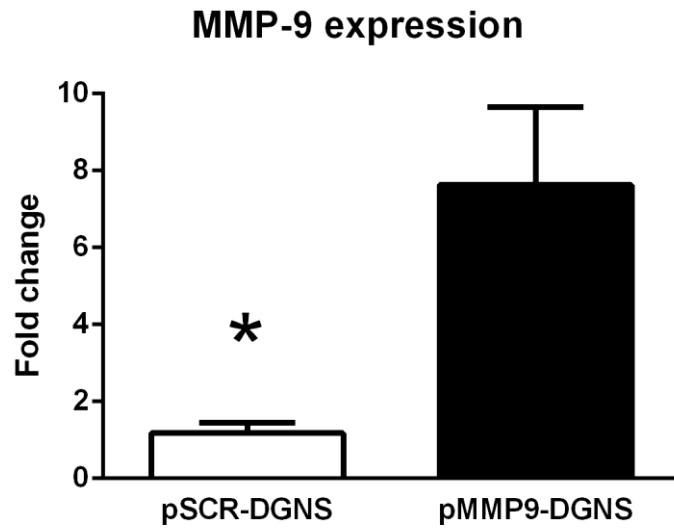

**Figure S5. Hepatic expression of MMP-9 in cirrhotic animals treated with pMMP9-dendrimer graphene nanostars (pMMP9-DGNS).** Quantification of gene expression of MMP-9 in cirrhotic livers from mice treated with scramble plasmid linked to dendrimer graphene nanostars (pSCR-DGNS) or pMMP9-DGNS by Real-time PCR. Values are mean  $\pm$  S.E.M. \* indicates  $P \leq 0.05$  using a Student's t-test.
