# Supplementary material
Source: PubMed Central journal article supplement (PMC6377857)
Supplement: NIHMS992797-supplement-S6.pdf [file NIHMS992797-supplement-S6.pdf]

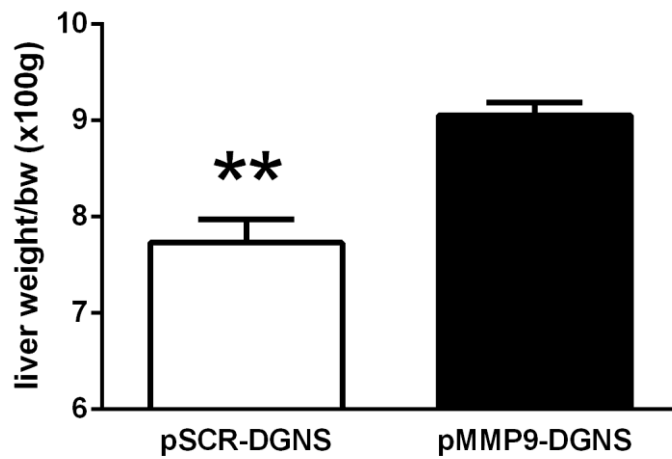

**Figure S6. *In vivo* effect of pMMP9-dendrimer graphene nanostars (pMMP9-DGNS) on liver size in cirrhotic mice.** Liver size as an indication of hepatic regeneration was calculated as liver weight/body weight $\times$ 100 in cirrhotic mice treated with scramble plasmid linked to dendrimer graphene nanostars (pSCR-DGNS) or pMMP9-DGNS. Values are mean  $\pm$  S.E.M. \*\* indicates  $P \leq 0.01$  using a Student's t-test.
