# Supplementary material
Source: PubMed Central journal article supplement (PMC6377857)
Supplement: NIHMS992797-supplement-S7.pdf [file NIHMS992797-supplement-S7.pdf]

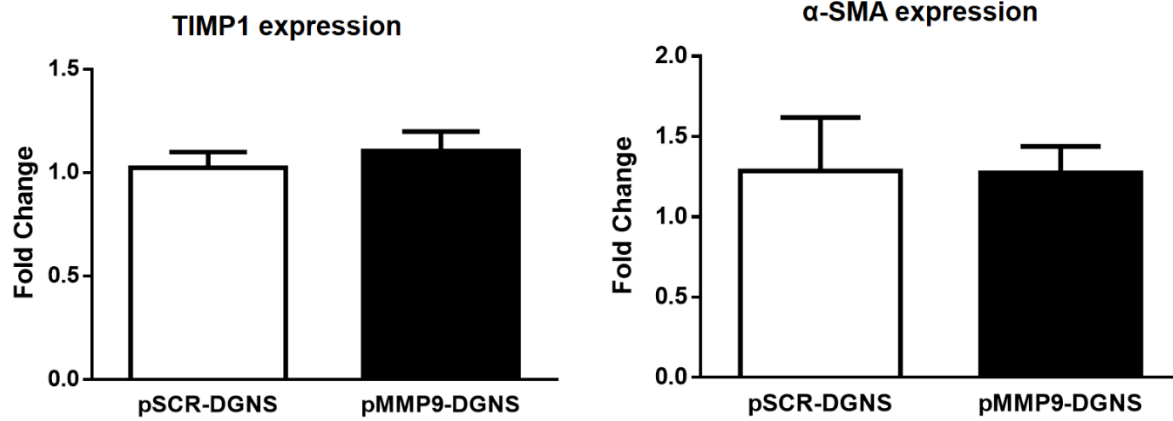

**Figure S7. Hepatic expression of hepatic stellate cells activation markers in cirrhotic mice treated with pMMP9-dendrimer graphene nanostars (pMMP9-DGNS).** Quantification of gene expression of tissue inhibitor of metalloproteinases 1 (TIMP1) and alpha smooth muscle actin ( $\alpha$ -SMA) in cirrhotic livers from mice treated with scramble plasmid linked to dendrimer graphene nanostars (pSCR-DGNS) or pMMP9-DGNS by Real-time PCR. Values are mean  $\pm$  S.E.M.
